# Supplementary material for: Ion-mediated control of structural integrity and reconfigurability of DNA nanostructures
Source: Royal Society of Chemistry journal article supplement (doi:10.1039/d2nr05780h), 2022-12-08
Supplement: d2nr05780h1.pdf [file d2nr05780h1.pdf]

## Supporting Information

### **Ion-mediated control of structural integrity and reconfigurability of DNA nanostructures**

Aleksandra Bednarz,<sup>1,2,§</sup> Steffan M. Sønderkov,<sup>1,§</sup> Mingdong Dong,<sup>1</sup> and Victoria Birkedal<sup>1,2\*</sup>

<sup>1</sup>Interdisciplinary Nanoscience Center (iNANO), Aarhus University, 8000 Aarhus, Denmark

<sup>2</sup>Department of Chemistry, Aarhus University, 8000 Aarhus, Denmark

§ A.B. and S.M.S contributed equally to this work

\*Corresponding author: [vicb@inano.au.dk](mailto:vicb@inano.au.dk)

#### **Contents list:**

Figures S1-S8

Tables S1-S2

(a)

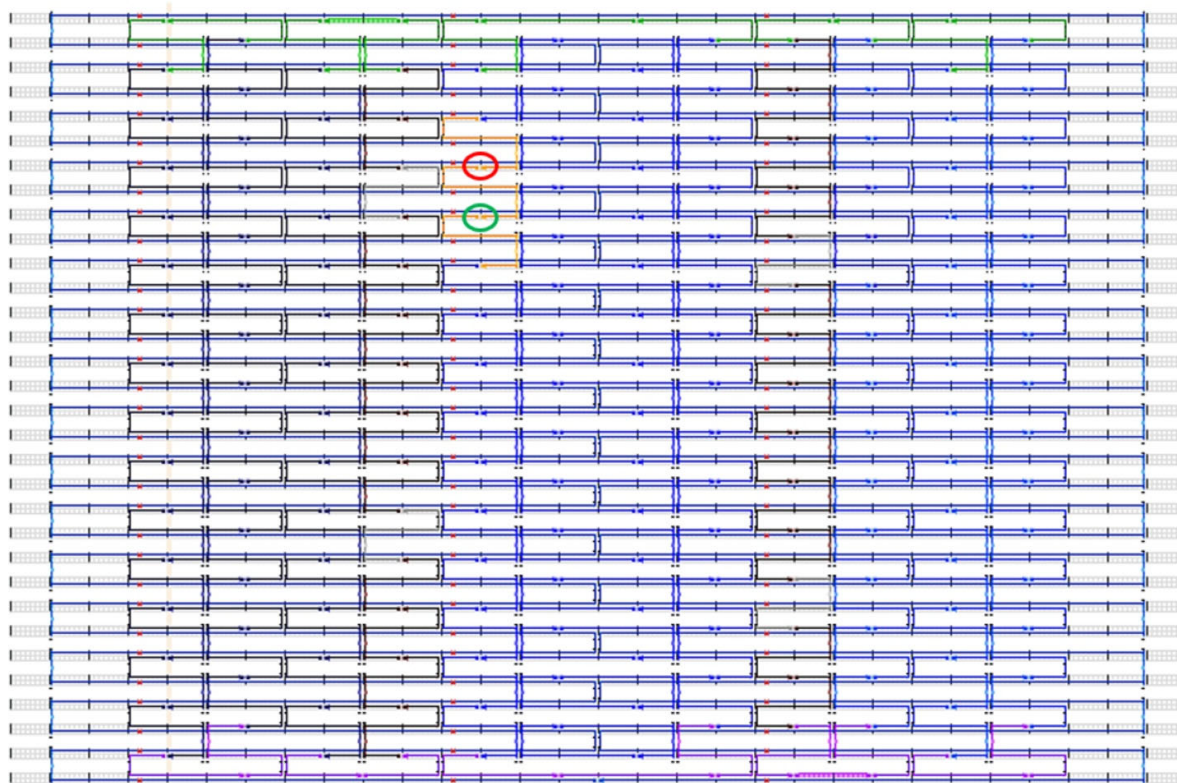

(b)

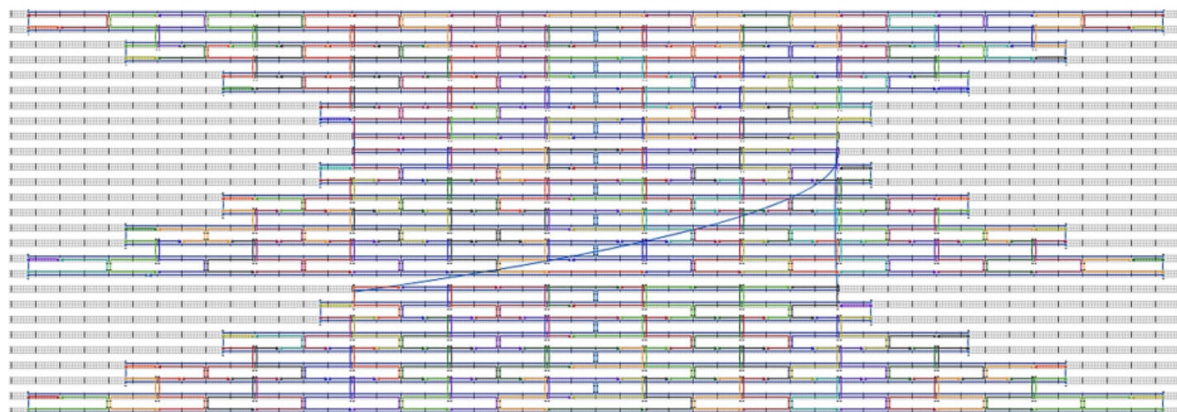

**Fig. S1.** DNA origami design for the rectangular (a) and triangular (b) nanostructures. The placement sites of the donor- and acceptor- labeled DNA duplexes, protruding from the surface of rectangular origami, are marked with green and red circles, respectively.

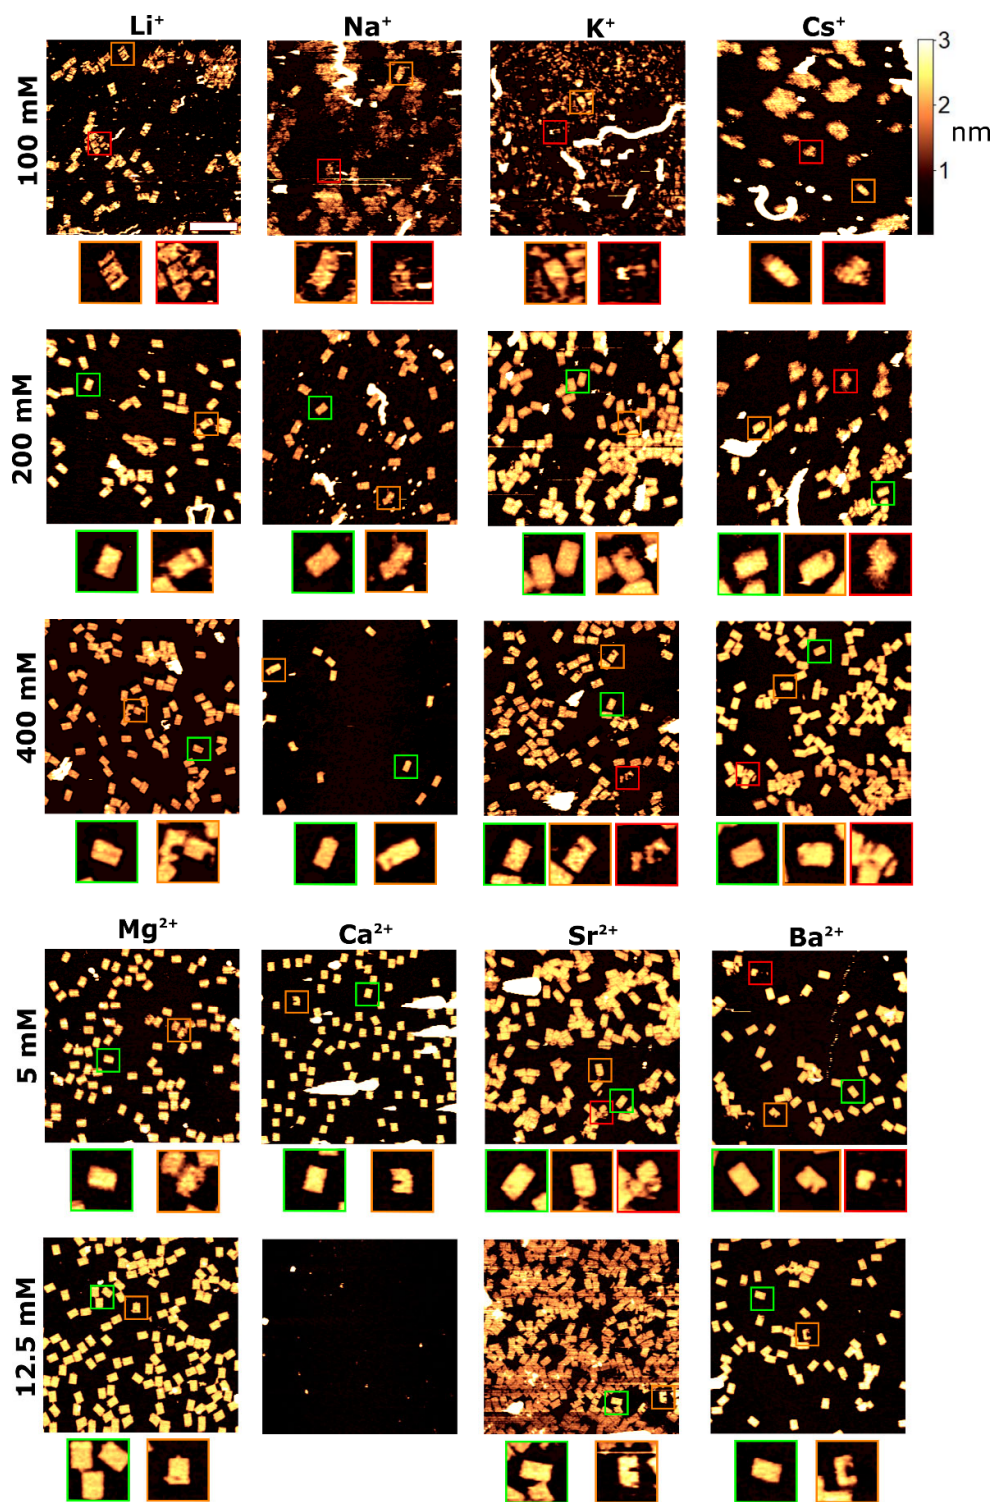

**Fig. S2.** AFM images showing rectangular DNA origami assembled in different ionic conditions. Below the images, examples of folded (green frame), semi-folded (orange frame) and unfolded (red frame) structures are shown. Scalebar: 500 nm.

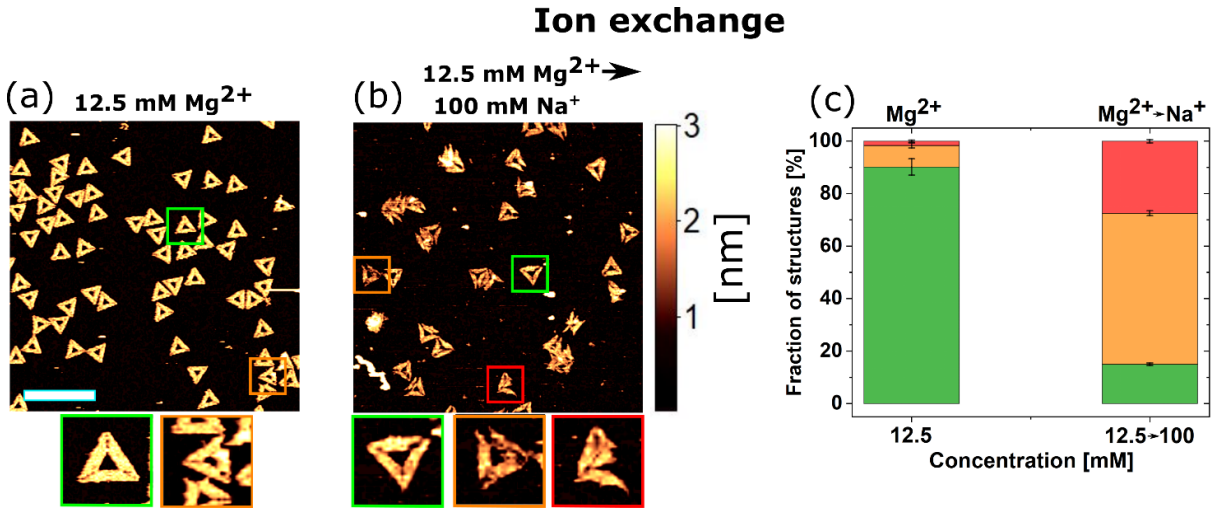

**Fig. S3.** Investigation of the ion-mediated responsiveness of the triangular origami under ion exchange conditions. (a) Constructs folded under optimal conditions in 12.5 mM Mg<sup>2+</sup> (control) and following ion exchange to 100 mM Na<sup>+</sup> (b). Scalebar: 500 nm. (c) Corresponding folding statistics.

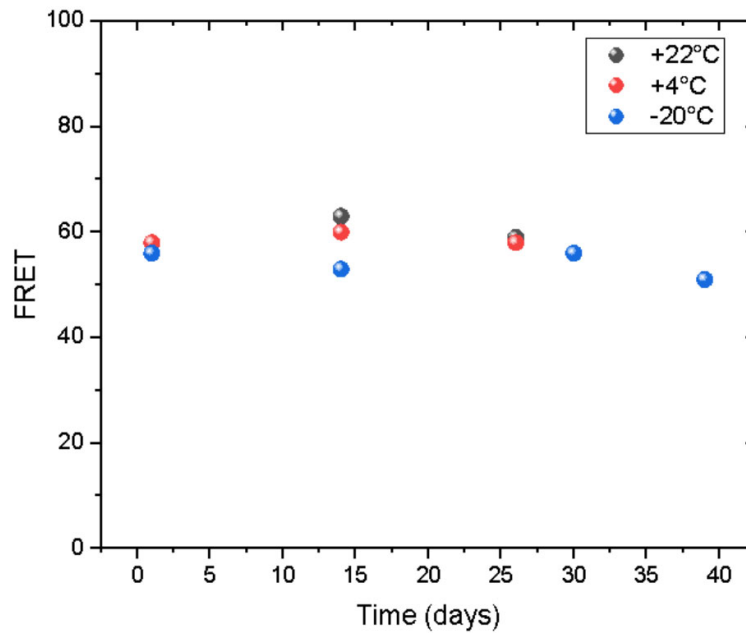

**Fig. S4.** Time- and temperature-dependent stability study of ion exchange samples from 12.5 mM MgCl<sub>2</sub> to 100 mM NaCl. Three individual samples were stored for the time periods specified on the x-axis at different temperatures. No significant changes in FRET were observed.



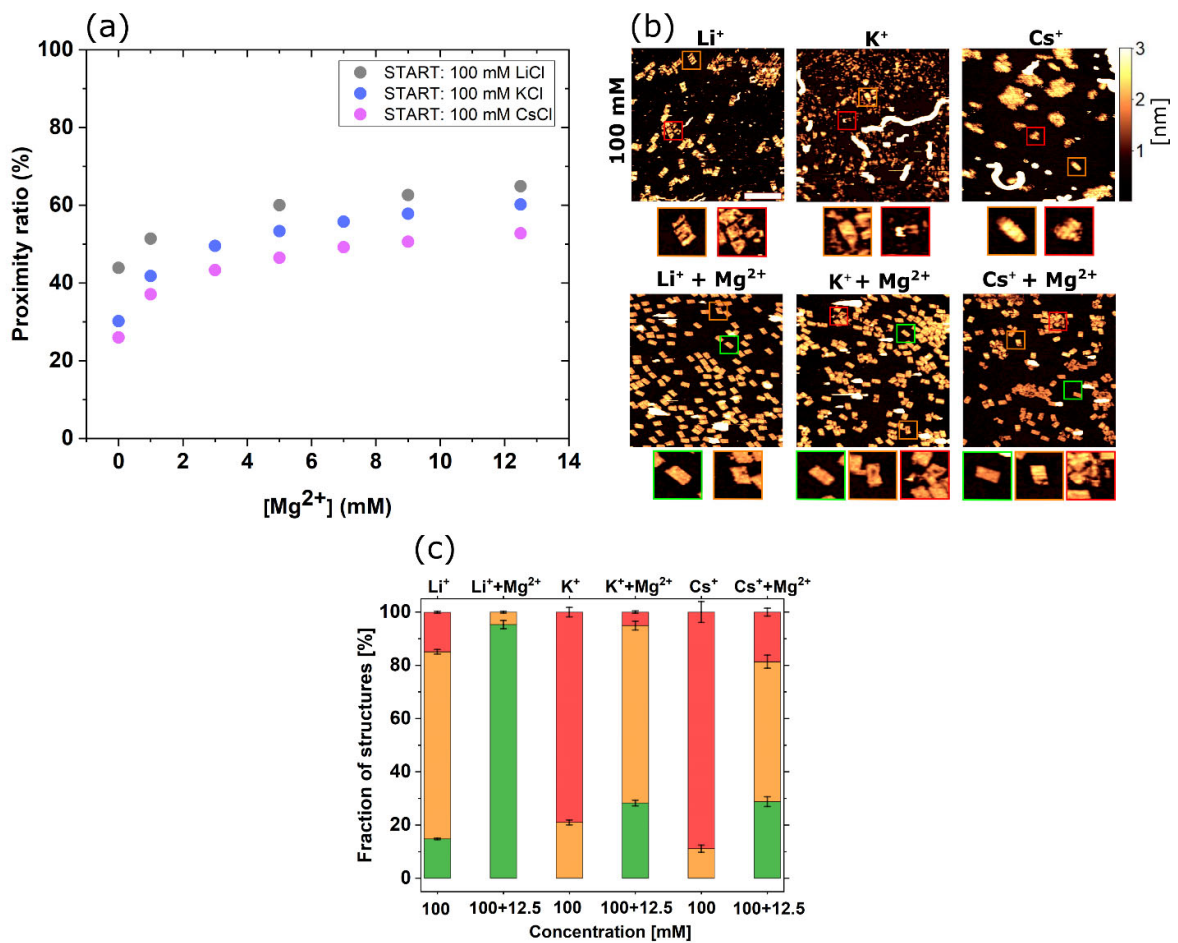

**Fig. S5.** Ion-mediated repair of rectangular constructs. (a) Magnesium-driven repair of origami samples folded in 100 mM LiCl, KCl and CsCl monitored by ensemble FRET. (b) After reaching the final concentration of  $MgCl_2$  of 12.5 mM, the repaired samples were imaged with AFM and compared to structures before repair. Scalebar: 500 nm. (c) Folding statistics before and after the addition of  $MgCl_2$ .

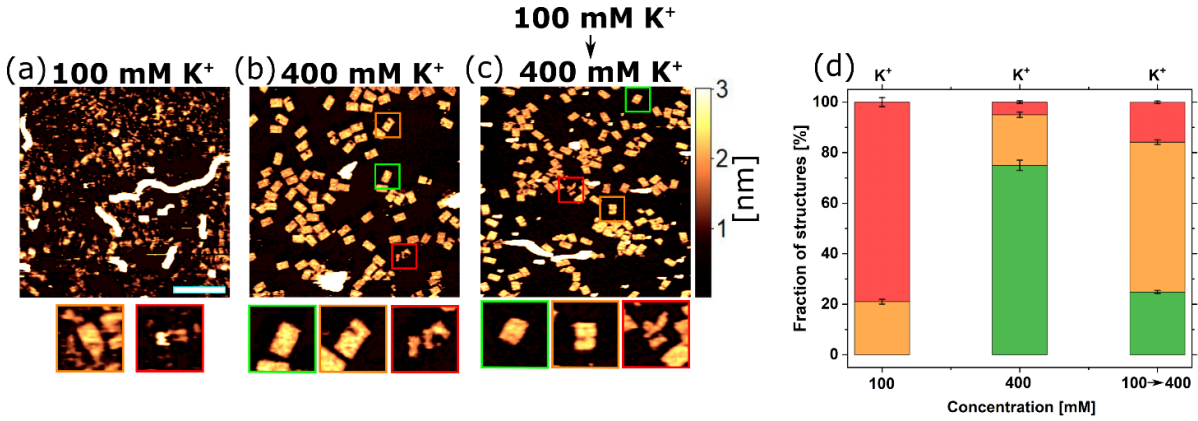

**Fig. S6.** Repair of origami samples by using monovalent ions. (a) DNA origami annealed in 100 mM KCl. (b) DNA origami annealed in 400 mM KCl. (c) DNA origami annealed in 100 mM KCl undergoing repair by adding KCl to a final concentration of 400 mM. Scalebar: 500 nm. (d) Folding statistics.

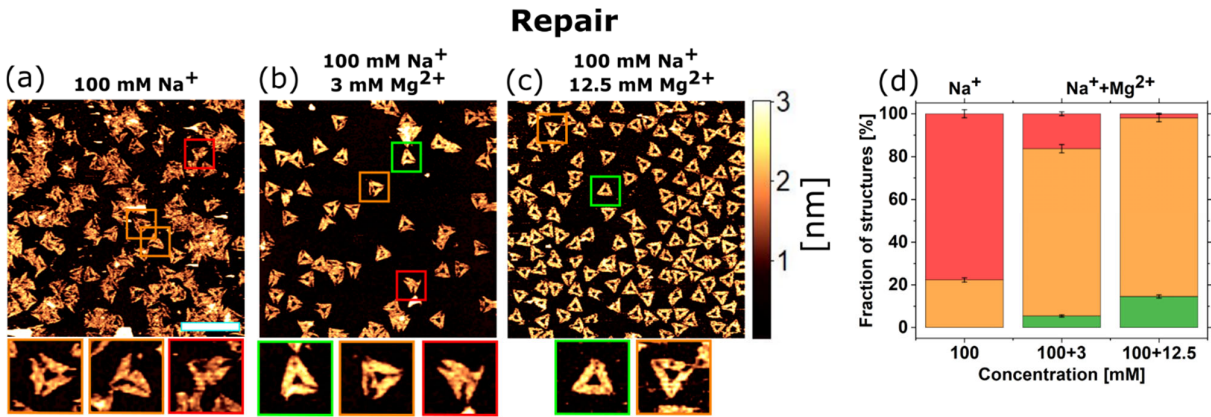

**Fig. S7.** Investigation of the ion-mediated responsiveness of the triangular origami under self-repair conditions. DNA origami sample folded in (a) 100 mM Na<sup>+</sup> and undergoing repair in (b) 100 mM Na<sup>+</sup> + 3 mM Mg<sup>2+</sup> and (c) 100 mM Na<sup>+</sup> + 12.5 mM Mg<sup>2+</sup>. Scalebar: 500 nm. (d) Corresponding folding statistics.

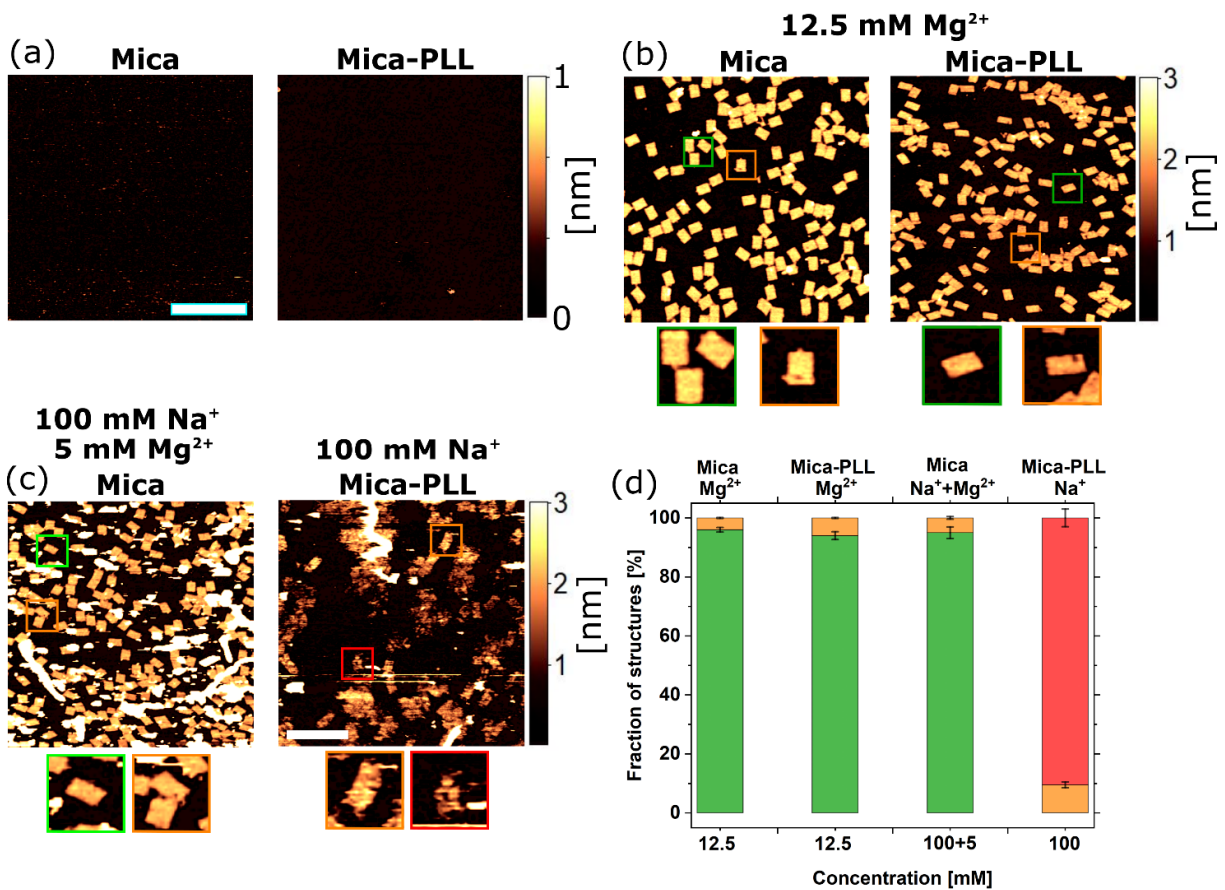

**Fig. S8.** Impact of origami deposition strategy on the structural integrity. (a) Comparison of mica and mica-PLL surfaces both showing near atomic flatness. (b) Deposition of DNA origami (annealed in 12.5 mM MgCl<sub>2</sub>) on mica and mica-PLL surfaces. (c) Deposition of DNA origami (annealed in 100 mM) on mica (requires addition of 5 mM Mg<sup>2+</sup>) and on mica-PLL (Mg<sup>2+</sup>-free deposition). The presence of Mg<sup>2+</sup> facilitates substantial repair of otherwise non-folded structures. Scalebar: 500 nm. (d) Corresponding folding statistics.

**Table S1.** Full list of staple strands in the rectangular construct. The modified oligonucleotides are marked in bold with respective extensions in yellow and fluorescent or bioitin modifications specified.

| 5' end       | 3' end       | Sequence                                     |
|--------------|--------------|----------------------------------------------|
| 0[31]        | 2[32]        | GGTGTATTCAGAACC GCCACCCTTTGTCGT              |
| 0[63]        | 2[64]        | CGAGAGGGCAGAGCCACCACCCTCCAGCCCTC             |
| 0[79]        | 0[64]        | GGCGGATAAGTGCCGT                             |
| 0[95]        | 2[96]        | TTTTGCTAGCCCAATAGGAACCACAACTA                |
| 0[127]       | 0[96]        | ACTCCTCAAGAGAAGGATTAGGATTAGCGGGG             |
| 0[167]       | 1[159]       | ACCTATTATTCTGAAGCAGTCT                       |
| 0[191]       | 2[192]       | TTAATGCCTCATA CATGGCTTTTGAGAACCAC            |
| 1[48]        | 0[32]        | GCCACCCTTTGATATAAGTATAGCCCGGAATA             |
| 1[112]       | 2[128]       | GTAACACTAATAAAATCCTCATTAATTGATATT            |
| 1[144]       | 0[128]       | TGGAAAGCACATGAAAGTATTAAGAGGCTGAG             |
| 1[160]       | 3[159]       | CTGAATTT CAGGAGGTTGAGGCACTTTTCA              |
| 1[176]       | 0[168]       | AGTAAGCGCCCTGCCTATTT CGGA                    |
| 1[208]       | 0[192]       | GGAGTG TAGAGTAACAGTGCCCGTATAAACAG            |
| 2[31]        | 4[32]        | CTTCCATTGCTAAACAACTTTGATACCGA                |
| 2[63]        | 4[64]        | ATAGTTAGGTGAGAATAGAAAGGACTTGCTTT             |
| 2[79]        | 0[80]        | TCCACAGAATTTTCAGGGATAGCACAGTACCA             |
| 2[95]        | 4[96]        | CAACGCCCGAATAATAATTTTTAAAGGAGC               |
| 2[127]       | 1[111]       | CACAAACAGAGTTTCGTCACCAGTCATGTACC             |
| 2[191]       | 4[192]       | CACCAGAGCCACCACCGGAACCGCGATAGCAG             |
| 3[48]        | 1[47]        | TCAGCGGACGTAACGATCTAAAGTTCAGAACC             |
| 3[112]       | 4[128]       | AAAATCTCTCGGTCATAGCCCCCTGTTTTCAT             |
| 3[144]       | 1[143]       | TTTGCCATGGTCAGACGATTGGCCAGCCAGAA             |
| 3[160]       | 5[159]       | TAATCAAACAAGTTTGCCTTTAGAGGTGAA               |
| 3[176]       | 1[175]       | AACCAGAGCCGCCGCCAGCATTGAACCGTTCC             |
| 3[208]       | 1[207]       | GAGCCGCCCTCAGAGCCGCCACCATGATACA              |
| 4[31]        | 6[32]        | TAGTTGCAACCGATATATTCGGTGCCACTA               |
| 4[63]        | 6[64]        | CGAGGTGAGGAGTTAAAGGCCGCTGGAAGTTT             |
| 4[79]        | 2[80]        | TTTATCAGACA ACTAAAGGAATTGTGTAGCAT            |
| <b>4[95]</b> | <b>6[96]</b> | <b>CTTTAATCCTCAGCAGCGAAAGGAGGCTTTTGTACTC</b> |
| 4[127]       | 3[111]       | CGGCATTTCAAAAAAAGGCTCCATCACGTTG              |
| 4[191]       | 6[192]       | CACCGTAAATTTGGGAATTAGAGCTTTGTCAC             |
| 5[48]        | 3[47]        | GCTTGCAGATTTCTTAAACAGCTTCAACAGTT             |
| 5[112]       | 6[128]       | GGAACGAGGAAGGTAATATTGACAACCGATT              |
| 5[144]       | 3[143]       | TTCATTAACGTCAGACTGTAGCGCTATTAGCG             |
| 5[160]       | 7[159]       | TTATCACCTACCAGCGCCAAAGACTGGCAT               |
| 5[176]       | 3[175]       | CTTGAGCCTCAGTAGCGACAGAATATCACCGG             |
| 5[208]       | 3[207]       | TCACCAGTCACCAATGAAACCATCCTCCCTCA             |
| 6[31]        | 8[32]        | CGAAGGCACTAAAACACTCATCGAAAGAGG               |
| 6[63]        | 8[64]        | CCATTAATATACCAAGCGGAAATCAATCAT               |
| 6[79]        | 4[80]        | TTTCATGATTTGCGGGATCGTCACTGTATCGG             |



|               |                |                                                           |
|---------------|----------------|-----------------------------------------------------------|
| <b>6[95]</b>  | <b>8[96]</b>   | <b>Cy3-GAGTACTTGAGGACTTTTGTATCATCGCCTATGTTACTTTCGAGGT</b> |
| 6[127]        | 5[111]         | GAGGGAGGGGTAGCAACGGCTACAACAGCATC                          |
| 6[191]        | 8[192]         | AATCAATAATGTTAGCAAACGTAGTAGCAATA                          |
| 7[48]         | 5[47]          | CCAGCGATCGGGTAAAATACGTAATCGCTGAG                          |
| 7[112]        | 8[128]         | GTGTCTGAAGAAACGCAATAATAACCCAGAAGG                         |
| 7[144]        | 5[143]         | CAAAAGAACAAAAGGGCGACATTCGGAAATTA                          |
| 7[160]        | 9[159]         | GATTAAGAAGAAAAGTAAGCAGAGAATTA                             |
| 7[176]        | 5[175]         | TACGCAGTGAAAATTCATATGGTTGTCACCGA                          |
| 7[208]        | 5[207]         | TACATAAACACGGAATAAGTTTATCAGCAAAA                          |
| 8[31]         | 10[32]         | ACAGATGGACCTTCATCAAGAGCGATTTTA                            |
| 8[63]         | 10[64]         | AAGGGAACCGGATATTCATTACCCTTTCAACT                          |
| <b>8[79]</b>  | <b>6[80]</b>   | <b>Biotin-GCAGACGGCAAAGTACAACGGAGAAAAGACTT</b>            |
| <b>8[95]</b>  | <b>10[96]</b>  | <b>Cy5-ACCTCGTTAGCCGGGCTGCTCATTAGTGCAGTAGT</b>            |
| 8[127]        | 7[111]         | AAACCGAGATCCGCGACCTGCTCCGATAAATT                          |
| 8[191]        | 10[192]        | GCTATCTTGGGTAATTGAGCGCTAATTATTTA                          |
| 9[48]         | 7[47]          | ACAAGAACCGAACTGACCAACTTTTTTGACCC                          |
| 9[112]        | 10[128]        | TTGCCCTGAACATAAAAAACAGGGACCTTTACA                         |
| 9[144]        | 7[143]         | AGACGGGATAGCCGAACAAAGTTAGGAATACC                          |
| <b>9[160]</b> | <b>11[159]</b> | <b>Biotin-CTGAACACTTTTGTTTAACGTCAATCAAGA</b>              |
| 9[176]        | 7[175]         | AAGTCAGAACCGAAGCCCTTTTACTCCTTAT                           |
| 9[208]        | 7[207]         | GAGATAACGCAAGAAACAATGAAAAAATACA                           |
| 10[31]        | 12[32]         | AGAACTGAAATCTACGTTAATAAAAAACCAA                           |
| 10[63]        | 12[64]         | TTAATCATCAACATTATTACAGGTCTATCATA                          |
| 10[79]        | 8[80]          | TGGTTTAAAAATCAACGTAACAAAAACGAGGC                          |
| 10[95]        | 12[96]         | AAATTGGTGAGATTTAGGAATAAAAGGAAT                            |
| 10[127]       | 9[111]         | GAGAGAATACGAGAAACACCAGAAAATAAGGC                          |
| 10[191]       | 12[192]        | TCCAATCACAATTTTATCCTGAAATTACCGC                           |
| 11[48]        | 9[47]          | TAACGGAATGTGAATTACCTTATGTAATCTTG                          |
| 11[112]       | 12[128]        | AACTAATGCTCCCGACTTGCGGGAAAGGCGTTT                         |
| 11[144]       | 9[143]         | AGCCTTAAAAAATGAAAATAGCAGAGCGCATT                          |
| 11[160]       | 13[159]        | TTAGTTGCTAGAAGGCTTATCCGAAACCAA                            |
| 11[176]       | 9[175]         | ACCCAGCTCAAATAAGAAACGATTCTCTGAACA                         |
| 11[208]       | 9[207]         | ACGCTAACCAAAATAAACAGCCATATATCAGA                          |
| 12[31]        | 14[32]         | AATAGCGGGTAATAGTAAAATAAAAGATT                             |
| 12[63]        | 14[64]         | ACCCTCGTGTCCAATACTGCGGAATATTATAG                          |
| 12[79]        | 10[80]         | GAGCAACAAGAAAGATTCATCAGTGCTTGAGA                          |
| 12[95]        | 14[96]         | TACGAGGTTGAATCCCCCTCAACATAAATC                            |
| 12[127]       | 11[111]        | TAGCGAACCCAGATACATAACGCCACCACATTC                         |
| 12[191]       | 14[192]        | GCCCAATATCATTCCAAGAACGGGACGACGAC                          |
| 13[48]        | 11[47]         | TGGATAGCTTACCAGACGACGATAAAACGAAC                          |
| 13[112]       | 14[128]        | AACAGTTCATAATATCCCATCCTAGTCCTGAA                          |
| 13[144]       | 11[143]        | GCATGTAGGTATTCTAAGAACGCGGGTTTTGA                          |
| 13[160]       | 15[159]        | TCAATAATCAGAACGCGCCTGTTTTGAGAA                            |
| 13[176]       | 11[175]        | TTTCCTTAGCAAGCAAATCAGATATATTTTGC                          |

|         |         |                                   |
|---------|---------|-----------------------------------|
| 13[208] | 11[207] | CAAGTACCTTTCATCGTAGGAATCTCTTACCA  |
| 14[31]  | 16[32]  | AAGAGGATCGAGCTTCAAAGCGTGGAAGTT    |
| 14[63]  | 16[64]  | TCAGAAGCAACTCCAACAGGTCAGATGTTTTA  |
| 14[79]  | 12[80]  | ACCCTGACTCGTCATAAATATTCACATAGTAA  |
| 14[95]  | 16[96]  | AAAAATCTAATTGCTCCTTTTGTTAATTGC    |
| 14[127] | 13[111] | CAAGAAAAAGAAAACGAGAATGACATGCTTTA  |
| 14[191] | 16[192] | AATAAACATGTAATTTAGGCAGAGTAAATAAG  |
| 15[48]  | 13[47]  | CGGAAGCAAAGCGGATTGCATCAGTTTAGAC   |
| 15[112] | 16[128] | TCATTTTTGTATAAAGCCAACGCTATACAAAT  |
| 15[144] | 13[143] | GGGCTTAATATCAACAATAGATAAATTTACGA  |
| 15[160] | 17[159] | TCGCCATATAGAAAAAGCCTGTTAATCGCA    |
| 15[176] | 13[175] | CGCCAACAACATGTTTCAGCTAATGCGGCTGTC |
| 15[208] | 13[207] | GAGCCAGTAAGTAATTCTGTCCAGTATTAAC   |
| 16[31]  | 18[32]  | TCATCCGTAGATTTAGTTTGAAGCCTCAG     |
| 16[63]  | 18[64]  | AATATGCAGCAAATGGTCAATAACCAAGGCAA  |
| 16[79]  | 14[80]  | AGCTCAACGATTAGAGAGTACCTTAGGTCTTT  |
| 16[95]  | 18[96]  | TGAATATTCATTTGGGGCGCGAAGTAGCAT    |
| 16[127] | 15[111] | TCTTACCAGCGGATGGCTTAGAGCATAAGAGG  |
| 16[191] | 18[192] | AATAAACATTCAAATATATTTTAGCTGAGAAG  |
| 17[48]  | 15[47]  | TACATTTCACTAAAGTACGGTGTCAACCAGAC  |
| 17[112] | 18[128] | GGTGCCATATATAACTATATGTAACGGCTTAG  |
| 17[144] | 15[143] | GCAAATCCTAGTATCATATGCGTTCAACAGTA  |
| 17[160] | 19[159] | AGACAAAGCATAGGTCTGAGAGAAGTACAT    |
| 17[176] | 15[175] | AAAACCTTCCGGAATCATAATTACTTTAACAA  |
| 17[208] | 15[207] | ATCTTCTGGTGATAAATAAGGCGTGATTTTC   |
| 18[31]  | 20[32]  | AGCATAACCTGTAATACTTTTGGATAAATT    |
| 18[63]  | 20[64]  | AGAATTAGTTCAACGCAAGGATAACACCATCA  |
| 18[79]  | 16[80]  | CATACAGGCTGTTTAGCTATATTTAATGCTGT  |
| 18[95]  | 20[96]  | TAACATCCATATATTTTAAATGAAAGGGTG    |
| 18[127] | 17[111] | GTTGGGTTCAATTCTACTAATAGTGCTGAAAA  |
| 18[191] | 20[192] | AGTCAATACCTTGCTTCTGTAAATGAATTATT  |
| 19[48]  | 17[47]  | GCCTTTATCAAATAAAGCAATAACCATTAGA   |
| 19[112] | 20[128] | GAGTAATGATTTCAATTTGAATTACTTAATTAC |
| 19[144] | 17[143] | ATGGAAACCTACCTTTTAAACCTCATGCTGAT  |
| 19[160] | 21[159] | AAATCAATAGATGATGAAACAAATCAGGTT    |
| 19[176] | 17[175] | GTGAATAAGTGAATTTATCAAATAACGCGAG   |
| 19[208] | 17[207] | TTAATTAAGCTTAGATTAAGACGTTAATTTTC  |
| 20[31]  | 22[32]  | AATGCCGGGCTATCAGGTCATTTTCGCATTA   |
| 20[63]  | 22[64]  | ATATGATACAAACAAGAGAATCGATTAAATTG  |
| 20[79]  | 18[80]  | AGTCAAATAAATTTTGTAGAACCCTCAATAAAT |
| 20[95]  | 22[96]  | AGAAAGGAACTAGCATGTCAATCCAAAAAC    |
| 20[127] | 19[111] | ATTTAACATGTAGGTAAAGATTACAATGCCT   |
| 20[191] | 22[192] | CATTTCAACAGTACCTTTTACATCTCAATATA  |
| 21[48]  | 19[47]  | GTCTGGAGTTCAACCGTTCTAGCTCGGGAGAA  |

|                |                |                                                |
|----------------|----------------|------------------------------------------------|
| 21[112]        | 22[128]        | CCCCGGTTGTAAAACAGAAATAAATCAAAT                 |
| 21[144]        | 19[143]        | GTAGATTTTCATCAAGAAAAACAACTTTTTTA               |
| 21[160]        | 23[159]        | TAACGTCCTGAATAATGGAAGGACGTTAT                  |
| 21[176]        | 19[175]        | TACAGTAATTACCTGAGCAAAAGAATATGTGA               |
| 21[208]        | 19[207]        | CAATAACGAAAATCGCGCAGAGGCCGTCGCTA               |
| 22[31]         | 24[32]         | AATTTTTCGCCATCAAAAATAAGAGGGGAC                 |
| 22[63]         | 24[64]         | TAAACGTTCTGTAGCCAGCTTTCATGGGCGCA               |
| <b>22[79]</b>  | <b>20[80]</b>  | <b>Biotin-GCAAATATTGAACGGTAATCGTAACCGGAGAC</b> |
| 22[95]         | 24[96]         | AGGAAGAGCGAGTAACAACCCGACCGTAAT                 |
| 22[127]        | 21[111]        | ATTTGCACGATAATCAGAAAAGCCCATATGTA               |
| 22[191]        | 24[192]        | ATCCTGATTATCATTTTGCGGAACGGAGCACT               |
| 23[48]         | 21[47]         | TGGCCTTCAATATTTTGTAAAATGCCTGAGA                |
| 23[112]        | 24[128]        | TCCGTGGGATTCGACAACTCGTATTTAGACTT               |
| 23[144]        | 21[143]        | TTGCCCGAGTTAGAACCTACCATAGAAATTGC               |
| <b>23[160]</b> | <b>25[159]</b> | <b>Biotin-TAATTTTAAATAGATAATACATTTCTAAAG</b>   |
| 23[176]        | 21[175]        | AGTAACATTGTTTGGATTATACTTGATGAATA               |
| 23[208]        | 21[207]        | CACCAGAAAGATGATGGCAATTCAGGGAGAAA               |
| 24[31]         | 26[32]         | GACGACAGCTTCCGGCACCGCCACGACGT                  |
| 24[63]         | 26[64]         | TCGTAACCCAGGCAAAGCGCCATTATTAAGTT               |
| 24[79]         | 22[80]         | GGTGTAGATCAACATTAATGTGATTGTATAA                |
| 24[95]         | 26[96]         | GGGATAGCAACTGTTGGGAAGGAGCTGGCG                 |
| 24[127]        | 23[111]        | TACAAACAAACAAACGGCGGATTGTCGGATTC               |
| 24[191]        | 26[192]        | AACAACATCAAACCTCAATCAACCATTAAA                 |
| 25[48]         | 23[47]         | CCGGAAACGTGCATCTGCCAGTTTTTCGCGTC               |
| 25[112]        | 26[128]        | TGCGGGCCTGCCACGCTGAGAGCCACACCGCC               |
| 25[144]        | 23[143]        | ATGAAAAATGAGGATTTAGAAGTATAAATCCT               |
| 25[160]        | 27[159]        | CATCACCTAGATAAAACAGAGGTCCAACAG                 |
| 25[176]        | 23[175]        | CTCAAATAATAGATTAGAGCCGTCAAAGTTTG               |
| 25[208]        | 23[207]        | CAGTTGGCATCTAAAATATCTTTAAAAGAAAC               |
| 26[31]         | 28[32]         | TGTAAAAGTCGACTCTAGAGGAGCTCACTG                 |
| 26[63]         | 28[64]         | GGGTAACGTCGAATTCGTAATCATATGAGTGA               |
| 26[79]         | 24[80]         | GCAAGGCGCGCCATTCAGGCTGCGGTCACGTT               |
| 26[95]         | 28[96]         | AAAGGGGTGTGTGAAATTGTTAGAAGCATA                 |
| 26[127]        | 25[111]        | TGCAACAGTCTTCGCTATTACGCCGCGATCGG               |
| 26[191]        | 28[192]        | AATACCGAGCGTAAGAATACGTGGGGAAAAAC               |
| 27[48]         | 25[47]         | TACCGAGCCCAGGGTTTTCCAGTTTCTGGTG                |
| 27[112]        | 28[128]        | CAATTCCATCACACGACCAGTAATTTGGCAGA               |
| 27[144]        | 25[143]        | CATTCTGGGAGGCGGTCAGTATTAAGCAGCAA               |
| 27[160]        | 29[159]        | AGATAGAAACGCTCAATCGTCTGGTAGCAA                 |
| 27[176]        | 25[175]        | ACCTGAAAACGAACCACCAGCAGATGCTGAAC               |
| 27[208]        | 25[207]        | ATATTTTTTAGCCCTAAAACATCGTATCTGGT               |
| 28[31]         | 30[32]         | CCCGCTTAATGAATCGGCCAATGGTGGTT                  |
| 28[63]         | 30[64]         | GCTAACTCGTTTGCCTATTGGGCGGGTTGCC                |
| 28[79]         | 26[80]         | GGTGCCTAGGTCATAGCTGTTTCCGATGTGCT               |

|         |         |                                   |
|---------|---------|-----------------------------------|
| 28[95]  | 30[96]  | AAGTGTATTTACCAGTGAGACCCTGAGAG     |
| 28[127] | 27[111] | TTCACCAGCACAAACATACGAGCCGTCCGCTCA |
| 28[191] | 30[192] | GCTCATGGCACTTGCCCTGAGTAGACCGATTAA |
| 29[48]  | 27[47]  | GAGAGGCGACATTAATTGCGTTGCTCCCCGGG  |
| 29[112] | 30[128] | GCTGATTGAAAGAGTCTGTCCATCGTGAGGCC  |
| 29[144] | 27[143] | TAACCGTTAAATGGATTATTTACAAAAAGGGA  |
| 29[160] | 31[159] | TACTTCTTGCCAGAATCCTGAGACCACACC    |
| 29[176] | 27[175] | AATAACATAAATACCTACATTTTGCCTTCTG   |
| 29[208] | 27[207] | AACTATCGGCCAGCCATTGCAACACACAGACA  |
| 30[31]  | 31[47]  | CCGAAATCCGAGATAGGGTTGAGTGTTGTT    |
| 30[63]  | 31[71]  | CCAGCAGGGAACAAGAGTCCACTA          |
| 30[79]  | 28[80]  | TCCACGCTCCAGGGTGGTTTTTCTAAGCCTGG  |
| 30[95]  | 31[111] | AGTTGCACCAACGTCAAAGGGCGAAAAACC    |
| 30[127] | 29[111] | ACCGAGTACCCTTACCAGCTGGCGGGCAACA   |
| 30[191] | 31[207] | AGGGATTTGGGCGCGTACTATGGTTGCTTTGA  |
| 31[48]  | 29[47]  | CCAGTTTGCGAAAATCCTGTTTGACGCGCGGG  |
| 31[72]  | 30[80]  | TTAAGAACGTGGACTGCAAGCGG           |
| 31[112] | 31[143] | GTCTATCAGGCAAGTGTAGCGGTCACGCTGCG  |
| 31[144] | 29[143] | CGTAACCAAGTGTTTTTATAATCAACGCAAAT  |
| 31[160] | 31[175] | CGCCGCGCTTAATGCG                  |
| 31[176] | 29[175] | CCGCTACATAGACAGGAACGGTACTGATTAGT  |
| 31[208] | 29[207] | CGAGCACGGGAGCTAAACAGGAGGAGAACTCA  |

**Table S2.** Full list of staple strands in the triangular construct.

| 5' end | 3' end | Sequence                                     |
|--------|--------|----------------------------------------------|
| 0[111] | 2[101] | AAAGAAGTTTTGCCAGCATAAAATATTCATTGACTCAACATGTT |
| 0[143] | 2[136] | GATAAAAACCAAATATTAACAGTTCAGAAATTAGAGCT       |
| 0[175] | 2[168] | AACACTATCATAACCCATCAAAAATCAGGTCTCCTTTTGA     |
| 0[207] | 2[200] | CGCCAAAAGGAATTACAGTCAGAAGCAAAGCGCAGGTCAG     |
| 0[239] | 2[232] | GAATACCACATTCAACTTAAGAGGAAGCCCCGATCAAAGCG    |
| 0[271] | 0[240] | ACAGGTAGAAAAGATTCATCAGTTGAGATTTAG            |
| 0[303] | 2[296] | TTAATAAACGAACTAACCGAACTGACCAACTCCTGATAA      |
| 0[335] | 2[328] | ACCAGTCAGGACGTTGGAACGGTGTACAGACCGAAACAAA     |
| 0[367] | 2[360] | ACCTTATGCGATTTTATGACCTTCATCAAGAGCATCTTTG     |
| 0[399] | 2[392] | TGGTTTAATTTCAACTCGGATATTCATTACCCACGAAAGA     |
| 0[442] | 1[431] | CCTGACGAGAAACACCAGAACGAGTAGGCTGCTCATTCAGTGA  |
| 1[69]  | 1[79]  | GGATAGCGTCC                                  |
| 1[80]  | 0[69]  | AATACTGCGGAATCGTAGGGGTAATAGTAAAATGTTTAGACT   |
| 1[264] | 2[248] | GCGCAGACTCCATGTTACTTAGCCCGTTTTAA             |
| 1[432] | 1[442] | ATAAGGCTTGC                                  |
| 2[119] | 0[112] | TGCTGTAGATCCCCCTCAAATGCTGCGAGAGGCTTTTGCA     |
| 2[135] | 4[133] | TAATTGCTTGGAAGTTTCATTCCAAATCGGTTGTA          |
| 2[151] | 0[144] | CGGATGGCACGAGAATGACCATAATCGTTTACCAGACGAC     |
| 2[167] | 4[168] | TAAGAGGTCAATTCTGCGAACGAGATTAAGCA             |



|        |        |                                            |
|--------|--------|--------------------------------------------|
| 2[183] | 0[176] | TAATTGCTTTACCCTGACTATTATGAGGCATAGTAAGAGC   |
| 2[199] | 4[200] | GATTAGAGATTAGATACATTTTCGCAAATCATA          |
| 2[215] | 0[208] | AACTCCAAGATTGCATCAAAAAGATAATGCAGATACATAA   |
| 2[231] | 4[232] | AACCAGACGTTTAGCTATATTTTCTTCTACTA           |
| 2[247] | 1[263] | TTCGAGCTAAGACTTCAAATATCGGGAACGAG           |
| 2[279] | 0[272] | CGACCTGCGGTCAATCATAAGGGAACGGAACAACATTATT   |
| 2[295] | 4[296] | ATTGTGTCTCAGCAGCGAAAAGACACCATCGCC          |
| 2[311] | 0[304] | TATCATCGTTGAAAAGAGGACAGATGGAAGAAAAATCTACG  |
| 2[327] | 4[328] | GTACAACGAGCAACGGCTACAGAGGATACCGA           |
| 2[343] | 0[336] | CCAAGCGCAGGCGCATAGGCTGGCAGAACTGGCTCATTAT   |
| 2[359] | 4[360] | ACCCCAGACTTTTTTCATGAGGAACTTGCTTT           |
| 2[375] | 0[368] | AAAACACTTAATCTTGACAAGAACTTAATCATTGTGAATT   |
| 2[391] | 3[399] | GGCAAAAGTAAAATACGTAATGCC                   |
| 2[410] | 0[400] | ACCAACCTAAAAATCAACGTAACAAATAAATTGGGCTTGAGA |
| 3[101] | 3[111] | TTAAATATGCA                                |
| 3[112] | 2[120] | ACTAAAGTACGGTGTCTGAATATAA                  |
| 3[264] | 4[248] | GCCGCTTTGCTGAGGCTTGCAGGGGAAAAGGT           |
| 3[400] | 3[410] | ACTACGAAGGC                                |
| 4[151] | 2[152] | TAAAGCTATATAACAGTTGATTCCCATTTTTG           |
| 4[167] | 6[165] | ATAAAGCCTTTGCGGGAGAAGCCTGGAGAGGGTAG        |
| 4[183] | 2[184] | TTAGCAAATAGATTTAGTTTGACCAGTACCTT           |
| 4[199] | 6[200] | CAGGCAAGATAAAAAATTTTTAGAAATTTCAAC          |
| 4[215] | 2[216] | CATCCAATAAATGGTCAATAACCTCGGAAGCA           |
| 4[231] | 6[232] | ATAGTAGTATGCAATGCCTGAGTAGGCCGGAG           |
| 4[247] | 3[263] | GGCATCAAATTTGGGGCGCGAGCTAGTTAAAG           |
| 4[279] | 2[280] | ATTCGGTCTGCGGGATCGTCACCCGAAATCCG           |
| 4[295] | 6[296] | CACGCATAAGAAAGGAACAACCTAAGTCTTTCC          |
| 4[311] | 2[312] | GACAACAAGCATCGGAACGAGGGTGAGATTTG           |
| 4[327] | 6[328] | TAGTTGCGAATTTTTTACGTTGATCATAGTT            |
| 4[343] | 2[344] | AACAGCTTGCTTTGAGGACTAAAGCGATTATA           |
| 4[359] | 5[367] | CGAGGTGAGGCTCCAAAAGGAGCC                   |
| 4[378] | 2[376] | CGGTTTATCAGGTTTCCATTAACGGGAATACACT         |
| 5[133] | 5[143] | CCAAAAACATT                                |
| 5[144] | 4[152] | ATGACCCTGTAATACTTCAGAGCA                   |
| 5[264] | 6[248] | CAACAGTTTATGGGATTTTGCTAATCAAAGG            |
| 5[368] | 5[378] | TTTAATTGTAT                                |
| 6[183] | 4[184] | TTAATGCCTTATTTCAACGCAAGGGCAAAGAA           |
| 6[199] | 8[192] | CGTTCTAGTCAGGTCATTGCCTGACAGGAAGATTGTATAA   |
| 6[215] | 4[216] | CAATATGACCCTCATATATTTTAAAGCATTAA           |
| 6[231] | 8[224] | ACAGTCAAAGAGAATCGATGAACGACCCCGGTTGATAATC   |
| 6[247] | 5[263] | GTGAGAAAATGTGTAGGTAAAGATACAACCTT           |
| 6[279] | 4[280] | ATTTTCTGTCAGCGGAGTGAGAATACCGATAT           |
| 6[295] | 8[288] | AGACGTTACCATGTACCGTAACACCCCTCAGAACCGCCAC   |
| 6[311] | 4[312] | GTTTTGTCAGGAATTGCGAATAATCCGACAAT           |
| 6[327] | 8[320] | AGCGTAACTACAACTACAACGCTATCACCGTACTCAGG     |
| 6[346] | 4[344] | ACAGACAGCCCAAATCTCCAAAAAATTTCTTA           |

|         |         |                                           |
|---------|---------|-------------------------------------------|
| 7[165]  | 7[175]  | CTATTTTTGAG                               |
| 7[264]  | 8[248]  | AGGGATAGCTCAGAGCCACCACCCCATGTCAA          |
| 7[336]  | 7[346]  | TGTAGCATTCC                               |
| 8[191]  | 6[184]  | GCAAATATTTAAATTGAGATCTACAAAGGCTACTGATAAA  |
| 8[223]  | 6[216]  | AGAAAAGCCCCAAAAGAGTCTGGAGCAAACAATCACCAT   |
| 8[247]  | 7[263]  | TCATATGTGTAATCGTAAAAGTATGTCATTTTC         |
| 8[287]  | 6[280]  | CCTCAGAACCGCCACCCAAGCCAATAGGAACGTAAATGA   |
| 8[319]  | 6[312]  | AGGTTTAGTACCGCCATGAGTTTCGTCACCAGGATCTAAA  |
| 9[192]  | 11[199] | GTTAAAATTCGCATTAATGTGAGCGAGTAACACACGTTGG  |
| 9[224]  | 11[231] | GCTCATTTTTTAACCAGCCTTCTGTAGCCAGGCATCTGC   |
| 9[264]  | 10[248] | TCGGGAGATATACAGTAACAGTACAAATAATT          |
| 9[288]  | 11[295] | CCTGATTGCTTTGAATTGCGTAGATTTTCAGGCATCAATA  |
| 9[320]  | 11[327] | GCGCAGAGGCGAATTAATTATTTGCACGTAAATTCTGAAT  |
| 10[175] | 10[165] | GTGGGAACAAA                               |
| 10[247] | 9[263]  | CGCGTCTGATAGGAACGCCATCAACTTTTACA          |
| 10[346] | 10[336] | ACCATATCAAA                               |
| 11[165] | 13[167] | CGGCGGATTGAATTCAGGCTGCGCAACGGGGGATG       |
| 11[184] | 9[191]  | GGATAGGTACCCGTCGGATTCTCTAAACGTTAATATTTT   |
| 11[200] | 13[199] | TGTAGATGGGTGCCGAAACCAGGAACGCCAG           |
| 11[216] | 9[223]  | GTAACCGTCTTTCATCAACATTAATAATTTTTGTTAAATCA |
| 11[232] | 13[231] | CAGTTTGACGCACTCCAGCCAGCTAAACGACG          |
| 11[264] | 12[248] | CCTGATTAAGGAGCGGAATTATCTCGGCCTC           |
| 11[280] | 9[287]  | TGGCAATTTTTAACGTCAGATGAAAACAATAACGGATTCCG |
| 11[296] | 13[295] | TAATCCTGATTATCATTTTTGCGGAGAGGAAGG         |
| 11[312] | 9[319]  | GATTATACACAGAAATAAAGAAATACCAAGTTACAAAATC  |
| 11[328] | 13[327] | AATGGAAGCGAACGTTATTAATTTCTAACAAC          |
| 12[143] | 12[133] | CGGTGCGGGCC                               |
| 12[247] | 11[263] | AGGAAGATGGGGACGACGACAGTAATCATATT          |
| 12[367] | 13[359] | ACAATTCGACAACCTCGTAATACAT                 |
| 12[378] | 12[368] | AGACTTTACAA                               |
| 13[133] | 15[135] | TCTTCGCTATTGGAAGCATAAAGTGTATGCCCGCT       |
| 13[152] | 12[144] | TGGCGAAATGTTGGGAAGGGCGAT                  |
| 13[168] | 15[167] | TGCTGCAAATCCGCTCACAATTTCCAGCTGCA          |
| 13[184] | 11[183] | AGTTGGGTCAAAGCGCCATTCGCCCGTAATG           |
| 13[200] | 15[199] | GGTTTTCCATGGTCATAGCTGTTTGAGAGGCG          |
| 13[216] | 11[215] | ACGTTGTATTCCGGCACCGCTTCTGGCGCATC          |
| 13[232] | 15[231] | GCCAGTGCATCCCCGGGTACCGAGTTTTTCT           |
| 13[264] | 14[248] | GCAAATCACCTCAATCAATATCTGCAGGTCGA          |
| 13[280] | 11[279] | AAGGAATTACAAAGAAACCACCAGTCAGATGA          |
| 13[296] | 15[295] | TTATCTAAAGCATCACCTTGCTGATGGCCAAC          |
| 13[312] | 11[311] | TAGGAGCATAAAAGTTTGAGTAACATTGTTTG          |
| 13[328] | 15[327] | TAATAGATCGCTGAGAGCCAGCAGAAGCGTAA          |
| 13[344] | 11[346] | TCAATAGATATTAATCCTTTGCCGGTTAGAACCT        |
| 13[360] | 15[359] | TTGAGGATGGTCAGTATTAACACCTTGAATGG          |
| 14[111] | 14[101] | ATGAGTGAGCT                               |
| 14[247] | 13[263] | CTCTAGAGCAAGCTTGCATGCCTGGTCAGTTG          |

|         |         |                                             |
|---------|---------|---------------------------------------------|
| 14[399] | 15[391] | ACCACCAGCAGAAGATGATAGCCC                    |
| 14[410] | 14[400] | ATACCGAACGA                                 |
| 15[101] | 17[111] | AACTCACATTATTGAGTGTTGTTCCAGAAACCGTCTATCATTT |
| 15[120] | 14[112] | GCGCTCACAAGCCTGGGGTGCCTA                    |
| 15[136] | 17[143] | TTCCAGTCCTTATAAATCAAAGAAGCCGGCGAACGTGGC     |
| 15[152] | 13[151] | TGTCGTGCACACAACATACGAGCCACGCCAGC            |
| 15[168] | 17[175] | TTAATGAAGTTTGATGGTGGTTCCAAAGCGAAAGGAGCGG    |
| 15[184] | 13[183] | CGCGCGGGCCTGTGTGAAATTGTTGGCGATTA            |
| 15[200] | 17[207] | GTTTGCGTACGCTGTTTGCCCAAGTGTAGCGGTCACG       |
| 15[216] | 13[215] | CCAGGGTGGCTCGAATTCGTAATCCAGTCACG            |
| 15[232] | 17[239] | TTTACCAGCCTGGCCCTGAGAGACACCCGCCGCGCTTAA     |
| 15[264] | 16[248] | CGACCAGTACATTGGCAGATTCACCTGATTGC            |
| 15[280] | 13[279] | GGACATTCACCTCAAATATCAAACACAGTTGA            |
| 15[296] | 17[303] | AGAGATAGTTTGACGCTCAATCGTACGTGCTTTCCTCGTT    |
| 15[312] | 13[311] | TGACCTGACAAATGAAAAATCTAAAATATCTT            |
| 15[328] | 17[335] | GAATACGTAACAGGAAAAACGCTCCTAACAGGAGGCCGA     |
| 15[344] | 13[343] | CAATATTTGCCTGCAACAGTGCCATAGAGCCG            |
| 15[360] | 17[367] | CTATTAGTATATCCAGAACAATATCAGGAACGGTACGCCA    |
| 15[376] | 13[378] | CGCGAACTAAAACAGAGGTGAGGCTTAGAAGTATT         |
| 15[392] | 17[399] | TAAAACATTAGAAGAACTCAAACTTTTTATAATCAGTGAG    |
| 16[79]  | 16[69]  | ACTATTAAGA                                  |
| 16[247] | 15[263] | CCTTACCCTGAGACGGGCAACAGCAGTCACA             |
| 16[431] | 17[442] | TCTTTGATTAGTAATAGTCTGTCCATCACGCAAATTAACCGTT |
| 16[442] | 16[432] | GTAGCAATACT                                 |
| 17[69]  | 16[80]  | ACGTGGACTCCAACGTCAAAGGGCGAATTTGGAACAAGAGTCC |
| 17[112] | 15[119] | AGAGCTTGACGGGGAAATAGCCCGAGATAGGGATTGCGTT    |
| 17[144] | 15[151] | GAGAAAGGAAGGGAAGGAAATCGGCAAAATCCGGGAAACC    |
| 17[176] | 15[183] | GCGCTAGGGCGCTGGCAGCAGGCGAAAATCCTTCGGCCAA    |
| 17[208] | 15[215] | CTGCGCGTAACCACCGTTGCAGCAAGCGGTCATTGGGCG     |
| 17[240] | 17[271] | TGCGCCGCTACAGGGCGCGTACTATGGTTGCT            |
| 17[272] | 15[279] | TTGACGAGCACGTATACTGAAATGGATTATTTAATAAAAAG   |
| 17[304] | 15[311] | AGAATCAGAGCGGGAGATGGAAATACCTACATAACCCTTC    |
| 17[336] | 15[343] | TTAAAGGGATTTTAGATACCGCCAGCCATTGCGGCACAGA    |
| 17[368] | 15[375] | GAATCCTGAGAAGTGTATCGGCCTTGCTGGTACTTTAATG    |
| 17[400] | 15[410] | GCCACCGAGTAAAAGAACATCACTTGCTGAGCGCCATTA AAA |
| 27[192] | 19[199] | GAGCAAAAAGAAGATGAGTGAATAACCTTGCTTATAGCTTA   |
| 27[224] | 19[231] | AAAACAAAATTAATTAATGGAAACAGTACATTAGTGAAT     |
| 27[264] | 18[248] | CGGGGTTTCTCAAGAGAAGGATTTTGAATTA             |
| 27[288] | 19[295] | GATAAGTGCCGTCGAGCTGAAACATGAAAGTATACAGGAG    |
| 27[320] | 19[327] | TAGCCCGGAATAGGTGAATGCCCCCTGCCTATGGTCAGTG    |
| 18[175] | 18[165] | TTAATTAATTT                                 |
| 18[247] | 27[263] | CCTTTTTTCATTTAACAATTTTCATAGGATTAG           |
| 18[346] | 18[336] | TATAAACAGTT                                 |
| 19[165] | 21[167] | TCCCTTAGAATAACGCGAGAAAACCTTTTACCGACC        |
| 19[184] | 27[191] | ACATAGCGCTGTAATCGTCGCTATTCAATTTCAATTACCT    |
| 19[200] | 21[199] | GATTAAGAAATGCTGATGCAAATCAGAATAAAA           |

|         |         |                                             |
|---------|---------|---------------------------------------------|
| 19[216] | 27[223] | AGAGTCAAAAATCAATATATGTGATGAAACAAACATCAAG    |
| 19[232] | 21[231] | TTATCAAACCGCTTAGGTTGGGTAAGCCTGT             |
| 19[264] | 20[248] | AGCGTCATGTCTCTGAATTTACCGACTACCTT            |
| 19[280] | 27[287] | TTTGATGATTAAGAGGCTGAGACTTGCTCAGTACCAGGCG    |
| 19[296] | 21[295] | TGTACTGGAAATCCTCATTAAAGCAGAGCCAC            |
| 19[312] | 27[319] | TTAACGGTTCGGAACCTATTATTAGGGTTGATATAAGTA     |
| 19[328] | 21[327] | CCTTGAGTCAGACGATTGGCCTTGCGCCACCC            |
| 20[143] | 20[133] | TTAATTCATC                                  |
| 20[247] | 19[263] | TTAACCTATCATAGGTCTGAGAGTTCCAGTA             |
| 20[367] | 21[359] | GCCGCCAGCATTGACACCACCTC                     |
| 20[378] | 20[368] | CCACCAGAGCC                                 |
| 21[133] | 23[135] | TTCTGACCTAAAATATAAAGTACCGACTGCAGAAC         |
| 21[152] | 20[144] | GTTTGAAATTCAAATATATTTTAG                    |
| 21[168] | 23[167] | GTGTGATAAGGCAGAGGCATTTTCAGTCCTGA            |
| 21[184] | 19[183] | GTTAAATACAATCGCAAGACAAAGCCTTGAAA            |
| 21[200] | 23[199] | CACCGGAATCGCCATATTTAACAAAATTTACG            |
| 21[216] | 19[215] | ACTAGAAATATATAACTATATGTACGCTGAGA            |
| 21[232] | 23[231] | TTAGTATCGCCAACGCTCAACAGTCGGCTGTC            |
| 21[264] | 22[248] | TTCATAATCCCCTTATTAGCGTTTTTCTTACC            |
| 21[280] | 19[279] | CCGGAACCCAGAATGGAAAGCGCAACATGGCT            |
| 21[296] | 23[295] | CACCGGAAAGCGCGTTTTTCATCGGAAGGGCGA           |
| 21[312] | 19[311] | CTCAGAGCATATTCACAAACAAATTAATAAGT            |
| 21[328] | 23[327] | TCAGAACCCAGAATCAAGTTTGCCGGTAAATA            |
| 21[344] | 19[346] | CAGAGCCAGGAGGTTGAGGCAGGTAACAGTGCCCG         |
| 21[360] | 23[359] | AGAGCCGCACCATCGATAGCAGCATGAATTAT            |
| 22[111] | 22[101] | CTGTCCAGACG                                 |
| 22[247] | 21[263] | AGTATAAAATATGCGTTATACAAAGCCATCTT            |
| 22[399] | 23[391] | CCATTAGCAAGGCCGGGGGAATTA                    |
| 22[410] | 22[400] | TAGCACCATTA                                 |
| 23[101] | 25[111] | ACGACAATAAATCCCGACTTGCGGGAGATCCTGAATCTTACCA |
| 23[120] | 22[112] | TCAGCTAAAAAAGGTAAAGTAATT                    |
| 23[136] | 25[143] | GCGCTGTTATTCTAAGAACGCGATTCCAGAGCCTAATTT     |
| 23[152] | 21[151] | AATAGATAGAGCCAGTAATAAGAGATTTAATG            |
| 23[168] | 25[175] | ACAAGAAAGCAAGCAAATCAGATAACAGCCATATTATTTA    |
| 23[184] | 21[183] | CCCATCTCGCCAACATGTAATTTAATAAGGC             |
| 23[200] | 25[207] | AGCATGTATTTTCATCGTAGGAATCAAACGATTTTTTGTTT   |
| 23[216] | 21[215] | TCAATAATAGGGCTTAATTGAGAATCATAATT            |
| 23[232] | 25[239] | TTTCCTTAGCACTCATCGAGAACAATAGCAGCCTTTACAG    |
| 23[264] | 24[248] | ATGGTTTATGTCACAATCAATAGATATTA AAC           |
| 23[280] | 21[279] | AAAGACAACATTTTCGGTCATAGCCAAAATCA            |
| 23[296] | 25[303] | CATTCAACAAACGCAAAGACACCAGAACACCCTGAACAAA    |
| 23[312] | 21[311] | GGAGGGAATTTAGCGTCAGACTGTCCGCCTCC            |
| 23[328] | 25[335] | TTGACGGAAATACATACATAAAGGGCGTAATATCAGAGA     |
| 23[344] | 21[343] | ATTAAAGGCCGTAATCAGTAGCGAGCCACCT             |
| 23[360] | 25[367] | CACCGTCACCTTATTACGCAGTATTGAGTTAAGCCCAATA    |
| 23[376] | 21[378] | AGCCATTTAAACGTCACCAATGAACACCAGAACCA         |



|         |         |                                             |
|---------|---------|---------------------------------------------|
| 23[392] | 25[399] | GAGCCAGCGAATACCCAAAAGAACATGAAATAGCAATAGC    |
| 24[79]  | 24[69]  | TCAAGATTAGT                                 |
| 24[247] | 23[263] | CAAGTACCTCATTCCAAGAACGGGAAATTCAT            |
| 24[431] | 25[442] | CAGAAGGAAACCGAGGTTTTTAAGAAAAGTAAGCAGATAGCCG |
| 24[442] | 24[432] | AACAAAGTTAC                                 |
| 25[69]  | 24[80]  | TGCTATTTTGCACCCAGCTACAATTTTGTTTTGAAGCCTTAAA |
| 25[112] | 23[119] | ACGCTAACGAGCGTCTGGCGTTTTAGCGAACCCAACATGT    |
| 25[144] | 23[151] | GCCAGTTACAAAATAATAGAAGGCTTATCCGGTTATCAAC    |
| 25[176] | 23[183] | TCCAATCCAAATAAGATTACCGCGCCAATAAATAATAT      |
| 25[208] | 23[215] | AACGTCAAAAATGAAAAGCAAGCCGTTTTTATGAAACCAA    |
| 25[240] | 25[271] | AGAGAATAACATAAAAACAGGGAAGCGCATT             |
| 25[272] | 23[279] | GACGGGAGAATTAACCTCGGAATAAGTTTATTTCCAGCGCC   |
| 25[304] | 23[311] | GTCAGAGGGTAATTGATGGCAACATATAAAAGCGATTGAG    |
| 25[336] | 23[343] | GATAACCCACAAGAATGTTAGCAAACGTAGAAAATTATTC    |
| 25[368] | 23[375] | ATAAGAGCAAGAAACATGGCATGATTAAGACTCCGACTTG    |
| 25[400] | 23[410] | TATCTTACCGAAGCCCAAACGCAATAATAACGAAAATCACCAG |
